# Supplementary material
Source: PubMed Central journal article supplement (PMC3528107)
Supplement: NIHMS426175-supplement-PB440368suppdata_pdf.pdf [file NIHMS426175-supplement-PB440368suppdata_pdf.pdf]

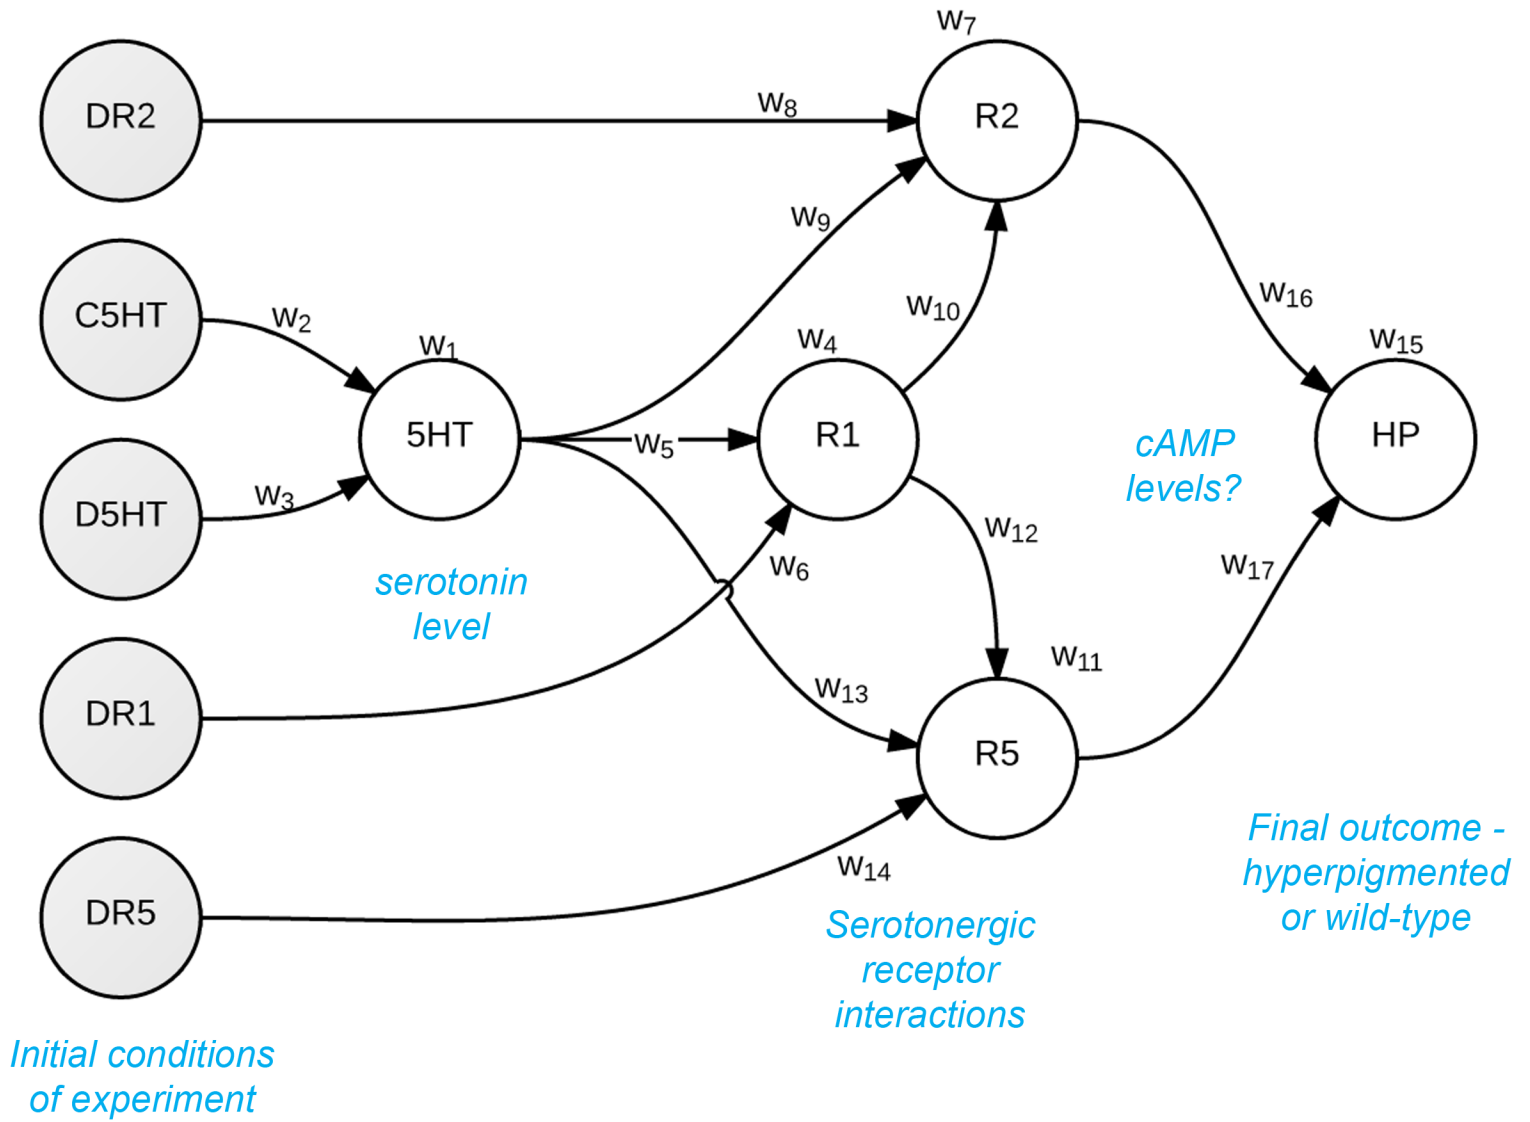

**LEGEND**

-  DRX Antagonist for serotonin receptor X
-  D5HT Ivermectin
-  C5HT Initial 5-HT concentration within the tadpole
-  Affected parameters
-  Weighted connections
